# Supplementary material
Source: PubMed Central journal article supplement (PMC4345361)
Supplement: AEM.03209-14_zam999116128so1.pdf [file AEM.03209-14_zam999116128so1.pdf]

*Supplementary information:*

Different bacterial populations associated with the roots and rhizosphere of rice  
incorporate plant-derived carbon

Marcela Hernández, Marc G. Dumont<sup>#</sup>, Quan Yuan and Ralf Conrad

<sup>#</sup>Max Planck Institute for Terrestrial Microbiology, Karl-von-Frisch-Str.10, 35043,  
Marburg, Germany

## Supplementary Table:

Table S1. Barcode and accession numbers of the experiments with their respective biosamples analyzed by 454-pyrosequencing. Raw data were deposited under the study accession number SRP043264 in the NCBI Sequence Read Archive (SRA)

| Sample                                                               | Barcode | Number of sequences* | Accession |
|----------------------------------------------------------------------|---------|----------------------|-----------|
| rice root control plant rep1 (CP1-root)                              | TCAGAG  | 2634                 | SRX620410 |
| rice root control plant rep2 (CP2-root)                              | TCGAGA  | 1830                 | SRX620411 |
| rice root control plant rep3 (CP3-root)                              | TCTCTC  | 1179                 | SRX620412 |
| rice root <sup>12</sup> CO <sub>2</sub> heavy rep1 (g12-1-04)        | ACACGT  | 1468                 | SRX620413 |
| rice root <sup>12</sup> CO <sub>2</sub> heavy rep2 (g12-2-04)        | AGAGTC  | 1830                 | SRX620414 |
| rice root <sup>12</sup> CO <sub>2</sub> heavy rep3 (g12-3-04)        | ATATCG  | 2025                 | SRX620415 |
| rice root <sup>12</sup> CO <sub>2</sub> light rep1 (g12-1-08)        | ACTGCA  | 2013                 | SRX620416 |
| rice root <sup>12</sup> CO <sub>2</sub> light rep2 (g12-2-08)        | AGTCAG  | 4383                 | SRX620417 |
| rice root <sup>12</sup> CO <sub>2</sub> light rep3 (g12-3-08)        | ATGCTA  | 2440                 | SRX620418 |
| rice root <sup>13</sup> CO <sub>2</sub> heavy rep1 (g13-1-04)        | CACAGT  | 1409                 | SRX620419 |
| rice root <sup>13</sup> CO <sub>2</sub> heavy rep2 (g13-2-04)        | CGATAT  | 1756                 | SRX620420 |
| rice root <sup>13</sup> CO <sub>2</sub> heavy rep3 (g13-3-04)        | GACTAG  | 2083                 | SRX620421 |
| rice root <sup>13</sup> CO <sub>2</sub> light rep1 (g13-1-08)        | CATGAC  | 2448                 | SRX620422 |
| rice root <sup>13</sup> CO <sub>2</sub> light rep2 (g13-2-08)        | CGTATA  | 1116                 | SRX620423 |
| rice root <sup>13</sup> CO <sub>2</sub> light rep3 (g13-3-08)        | GATCGA  | 1904                 | SRX620424 |
| rice rhizosphere control plant rep1 (CP1-rhizo)                      | TCAGAG  | 4216                 | SRX620425 |
| rice rhizosphere control plant rep2 (CP2-rhizo)                      | TCGAGA  | 2137                 | SRX620426 |
| rice rhizosphere control plant rep3 (CP3-rhizo)                      | TCTCTC  | 1550                 | SRX620427 |
| rice rhizosphere <sup>12</sup> CO <sub>2</sub> heavy rep1 (g12-1-04) | ACACGT  | 1302                 | SRX620428 |
| rice rhizosphere <sup>12</sup> CO <sub>2</sub> heavy rep2 (g12-2-04) | AGAGTC  | 1449                 | SRX620429 |
| rice rhizosphere <sup>12</sup> CO <sub>2</sub> heavy rep3 (g12-3-04) | ATATCG  | 2310                 | SRX620430 |
| rice rhizosphere <sup>12</sup> CO <sub>2</sub> light rep1 (g12-1-08) | ACTGCA  | 2760                 | SRX620431 |
| rice rhizosphere <sup>12</sup> CO <sub>2</sub> light rep2 (g12-2-08) | AGTCAG  | 1719                 | SRX620432 |
| rice rhizosphere <sup>12</sup> CO <sub>2</sub> light rep3 (g12-3-08) | ATGCTA  | 3766                 | SRX620433 |
| rice rhizosphere <sup>13</sup> CO <sub>2</sub> heavy rep1 (g13-1-04) | CACAGT  | 1822                 | SRX620434 |
| rice rhizosphere <sup>13</sup> CO <sub>2</sub> heavy rep2 (g13-2-04) | CGATAT  | 1053                 | SRX620435 |
| rice rhizosphere <sup>13</sup> CO <sub>2</sub> heavy rep3 (g13-3-04) | GACTAG  | 1773                 | SRX620436 |
| rice rhizosphere <sup>13</sup> CO <sub>2</sub> light rep1 (g13-1-08) | CATGAC  | 1835                 | SRX620437 |
| rice rhizosphere <sup>13</sup> CO <sub>2</sub> light rep2 (g13-2-08) | CGTATA  | 1360                 | SRX620438 |
| rice rhizosphere <sup>13</sup> CO <sub>2</sub> light rep3 (g13-3-08) | GATCGA  | 2670                 | SRX620439 |

\*: number of sequences after quality analysis

Partial 16S rRNA primers:

F515 (5'-GTGCCAGCMGCCGCGTAA), R806 (5'-GGACTACVSGGGTATCTAAT)

Adaptor primers:

forward (5'-GATGGCCATTACGGCC), reverse (5'-GGTGGCCGAGGCGGCC)

Supplementary Figures:

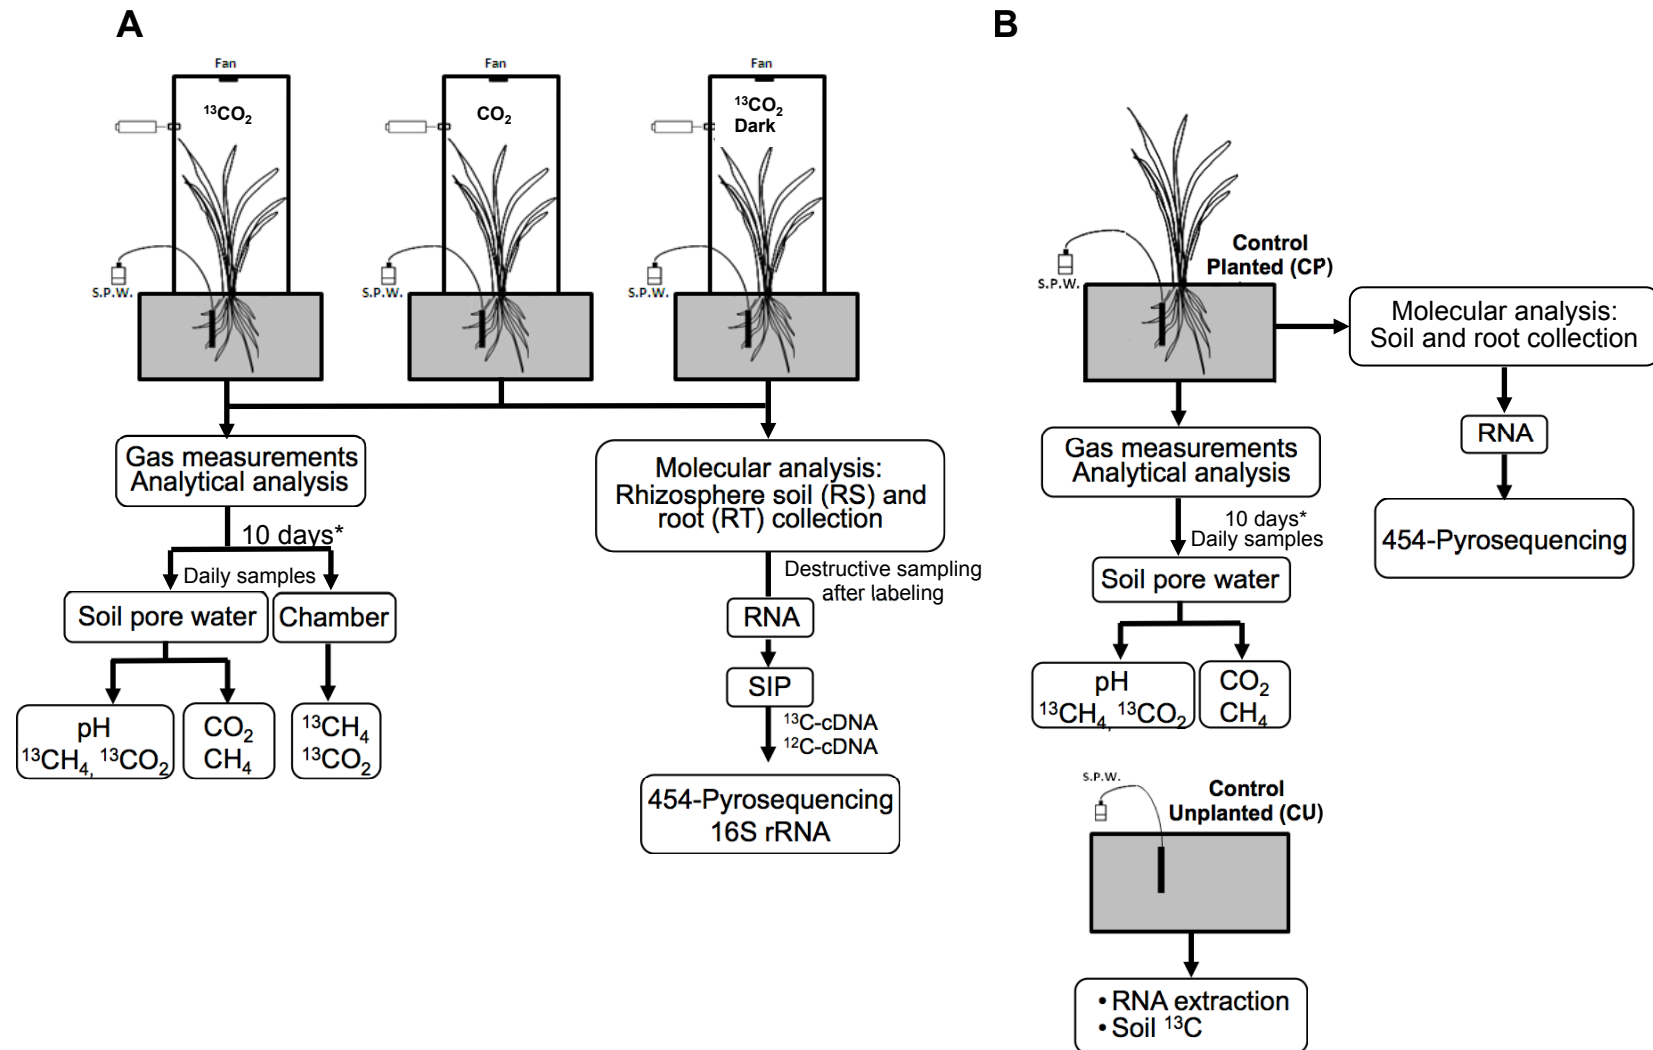

**Figure S1.** Scheme depicting the set-up of microcosms with elevated  $^{13}\text{CO}_2$  and  $^{12}\text{CO}_2$  (A) or control incubations with ambient  $\text{CO}_2$  (B).  
 \*End of the experiment:  $^{13}\text{C}$  content and TOC were measured for RS and plant samples. Figures modified from Lu and Conrad (1).

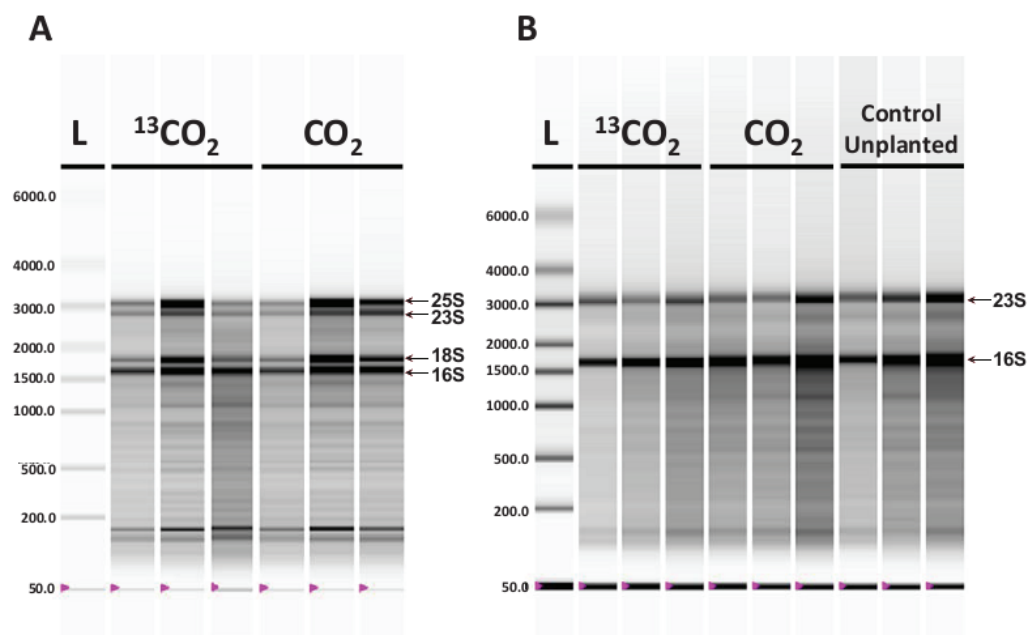

**Figure S2.** Root (A) and soil (B) RNA extracts visualized by electrophoresis on Experion RNA HighSens Chips.

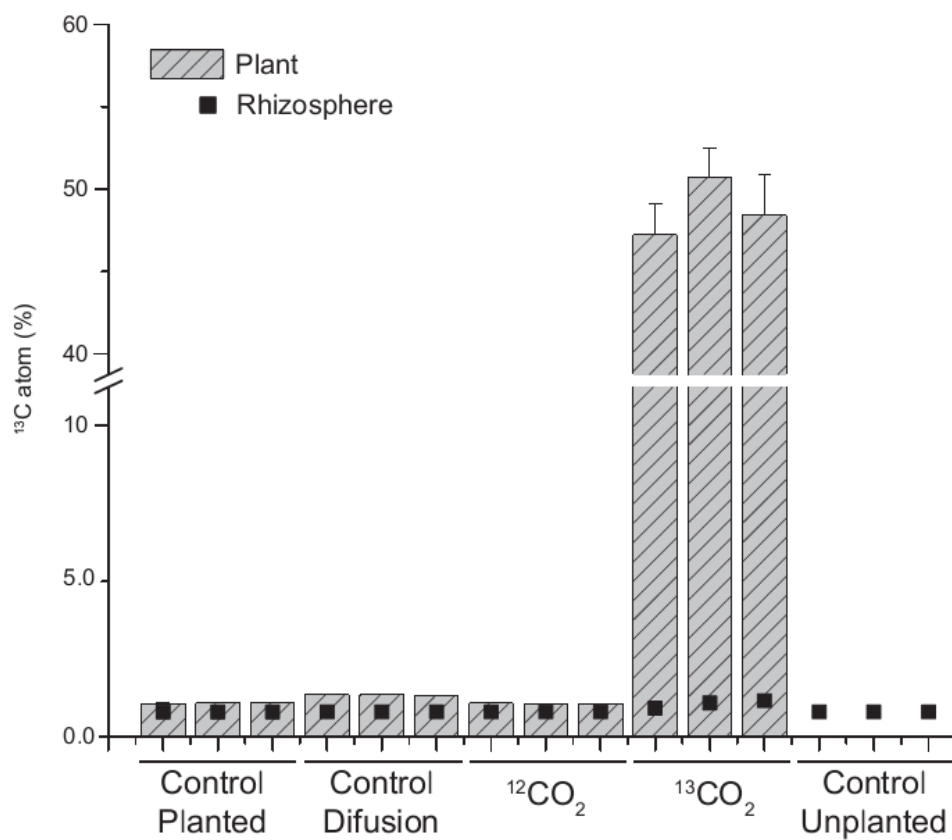

**Figure S3.**  $^{13}\text{C}$  atomic percent in plant biomass and rhizosphere soil after 10 days of labeling. Bars in plant biomass show standard deviation of triplicate technical measurements.

## References

1. **LuY, Conrad R.** 2011. Stable isotope probing and plants, p. 151-163. *In* Murrell JC, Whiteley A (ed), Stable Isotope Probing and Related Technologies, ASM Press: Washington.
